# Supplementary material
Source: PubMed Central journal article supplement (PMC3147385)
Supplement: supp_77_14_4849__1.pdf [file supp_77_14_4849__1.pdf]

Table 1S  
Oligonucleotides used

|            |                                                                                                                                                                                                                                                                                            |
|------------|--------------------------------------------------------------------------------------------------------------------------------------------------------------------------------------------------------------------------------------------------------------------------------------------|
| SrtAF      | 5' end of <i>srtA</i> of <i>B. anthracis</i><br>gacagAAGCTT <b>aaaggagtgaaggtt</b> gt atgaataagcaaagaattatag                                                                                                                                                                               |
| SrtAR      | 3' end of <i>srtA</i> of <i>B. anthracis</i><br>gacagGGATCC <u>ttattatcatcatcatcttataat</u> ctttctcgc                                                                                                                                                                                      |
| PhrCF      | 5' end of <i>phrC</i> of <i>B. subtilis</i><br>gacagAAGCTT <b>aaaggagtgaaggtt</b> gt atg                                                                                                                                                                                                   |
| PhrCR      | 3' end of <i>phrC</i> of <i>B. subtilis</i><br>gacagACTAGTgtcacatgaaagtcgagtg                                                                                                                                                                                                              |
| HisCelAF   | 5' end of <i>celA</i> of <i>C. thermocellum</i><br>gacagACTAGT <u>catcatcatcatcatcatcat</u> gcagggtgcttttaacacaaaatac                                                                                                                                                                      |
| HisCelAR   | 3' end of <i>celA</i> of <i>C. thermocellum</i><br>gacagGCGGCCGCataaggtaggtgggtatgc                                                                                                                                                                                                        |
| FibF       | 5' end of the c-terminal domain of <i>fibronectin binding protein B</i> of <i>S. aureus</i><br>gacagGCGGCCGCcaagtaagtggtcataatgaaggtc                                                                                                                                                      |
| FibR       | 3' end of the c-terminal domain of <i>fibronectin binding protein B</i> of <i>S. aureus</i><br>gacagGCATGCttatgcttctgtgattctttttattctcgcg                                                                                                                                                  |
| CohF       | 5' end of the second cohesin of <i>cipA</i> of <i>C. thermocellum</i><br>gacagACTAGT <u>catcatcatcatcatcat</u> gggtggtgtagtagaaattgg                                                                                                                                                       |
| CohR       | 3' end of the second cohesin of <i>cipA</i> of <i>C. thermocellum</i><br>gacagGCGGCCGCcttggtcgggttgctcattgc                                                                                                                                                                                |
| DoctF      | 5' end of the CBM and dockerin module of <i>xyn10B</i> of <i>C. thermocellum</i><br>gacagGCGGCCGCcagtcgcaatggggcgacggtaa                                                                                                                                                                   |
| DoctR      | 3' end of the CBM and dockerin module of <i>xyn10B</i> of <i>C. thermocellum</i><br>gacagGCATGCttaaggattttctgctacagg                                                                                                                                                                       |
| CelA-DoctF | 5' end of the <i>celA-doct</i> fusion protein<br>gacaGCTAGCgcagggtgcttttaacac                                                                                                                                                                                                              |
| CelA-DoctR | 3' end of the <i>celA-doct</i> fusion protein<br>gacagAAGCTTtaaggattttctgctacag                                                                                                                                                                                                            |
| GSTF       | 5' end of <i>fgst</i> of pGEX-4t containing 20 nt from <i>fibronectin binding protein B</i> of <i>S. aureus</i><br>gaaataaaaagaatcacaagaatgcccctatactagggtattgg                                                                                                                            |
| GSTR       | 3' end of <i>fgst</i> of pGEX-4t<br>gacagGCATGCttatgctcagatgcggccgctcg                                                                                                                                                                                                                     |
| FibGSTR    | 3' end of <i>fibronectin binding protein B</i> of <i>S. aureus</i> containing 20 nt of <i>fgst</i> of pGEX-4t<br>ccaataacctagtaggggacattgcttctgtgattctttttatttc                                                                                                                            |
| Scaff      | 5' end of fusion scaffold containing a type I cohesin of <i>C. cellulolyticum cipC</i> ,<br>a type I cohesin and CBM of <i>C. thermocellum cipA</i> , and a type I cohesin of <i>scaB</i> of <i>R. flavefaciens</i><br>gacagACTAGT <u>taccatacagatgtccagattacgct</u> ggcgattctctaaagttacag |
| ScafR      | 3' end of fusion scaffold containing a type I cohesin of <i>C. cellulolyticum cipC</i> ,<br>a type I cohesin and CBM of <i>C. thermocellum cipA</i> , and a type I cohesin of <i>scaB</i> of <i>R. flavefaciens</i><br>gacagGCGGCCGCcttaacaatgatagcgcc                                     |

Restriction sites are in uppercase. Ribosomal binding sites used are in bold. Nucleotide sequence for FLAG tag is italicized and underlined. Nucleotide sequence for polyhistidine tag is underlined. Nucleotide sequence for HA tag is italicized.
